# Supplementary material for: Co-recovery of spent LiCoO2 and LiFePO4 by paired electrolysis
Source: Royal Society of Chemistry journal article supplement (doi:10.1039/d3gc03322h), 2023-11-29
Supplement: d3gc03322h1.pdf [file d3gc03322h1.pdf]

## **Supporting Information**

### **Co-recovery of spent $\text{LiCoO}_2$ and $\text{LiFePO}_4$ by paired electrolysis**

JJingjing Zhao<sup>1</sup>, Fengyin Zhou<sup>1</sup>, Hongya Wang<sup>1</sup>, Xin Qu<sup>1</sup>, Danfeng Wang<sup>1</sup>, Zhiyu Zheng<sup>1</sup>, Yuqi Cai<sup>1</sup>, Shuaibo Gao<sup>1\*</sup>, Dihua Wang<sup>1,2</sup>, Huayi Yin<sup>1,2\*</sup>

1. School of Resource and Environmental Science, Wuhan University, 299 Bayi Road, Wuchang District, Wuhan 430072, P. R. China.
2. Hubei International Scientific and Technological Cooperation Base of Sustainable Resources and Energy, Wuhan 430072, P. R. China.

\*Corresponding author. Email: [1281850276@qq.com](mailto:1281850276@qq.com) (Shuaibo Gao)

\*Corresponding author. Email: [yinhuayi@whu.edu.cn](mailto:yinhuayi@whu.edu.cn) (Huayi Yin)

Number of pages: 21

Number of figures: 13

Number of tables: 5

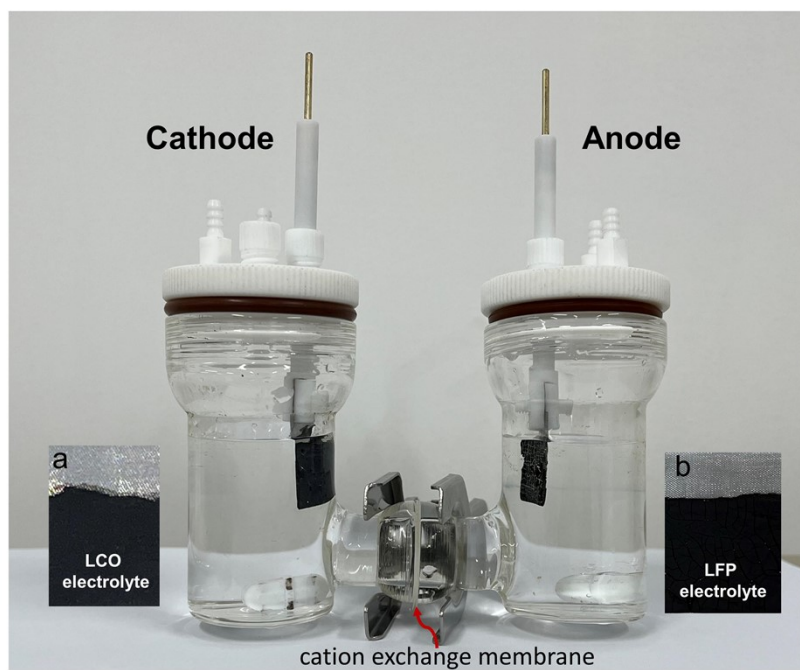

**Fig. S1** Digital photos of the homemade LCO and LFP electrodes and the H-type electrolyzer.

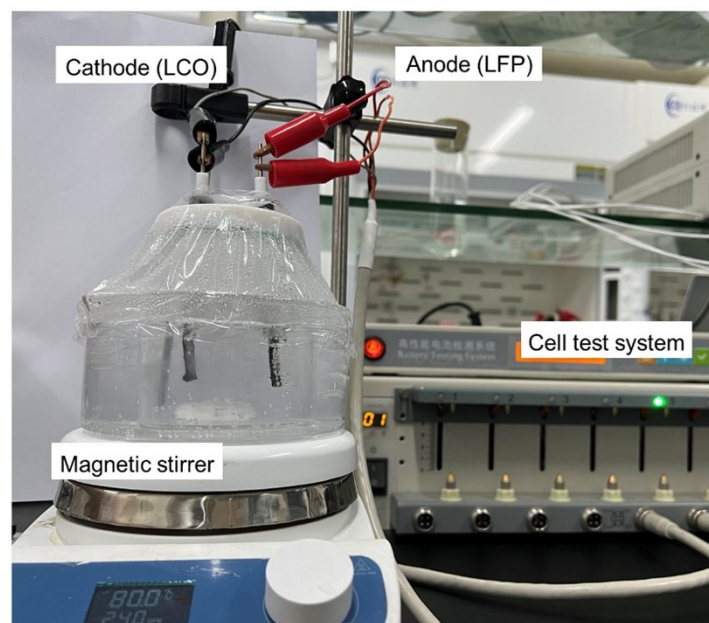

**Fig. S2** Schematic diagram of the electrolysis unit

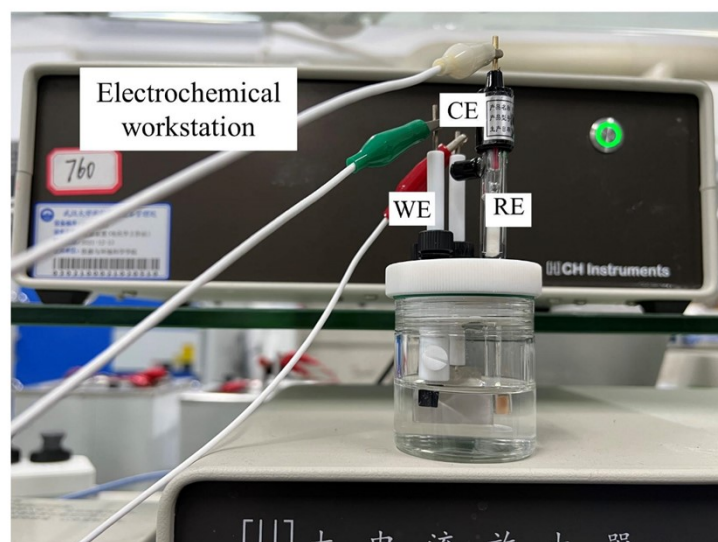

**Fig. S3** Schematic diagram of the electrochemical workstation



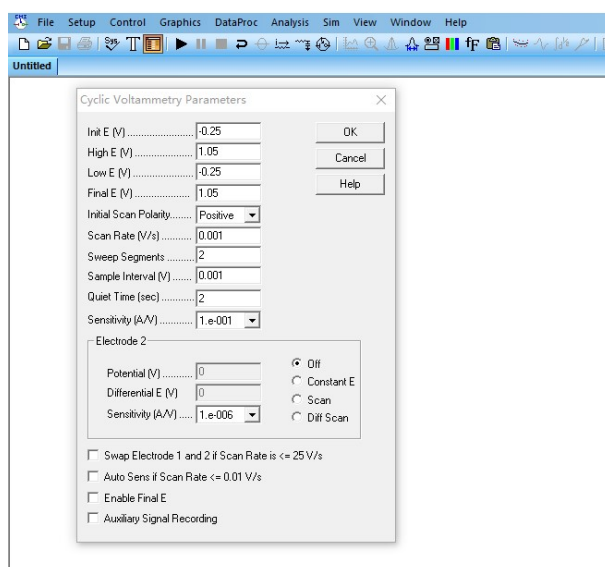

**Fig. S5** Programming the electrochemical workstation for cyclic voltammetry testing of LFP

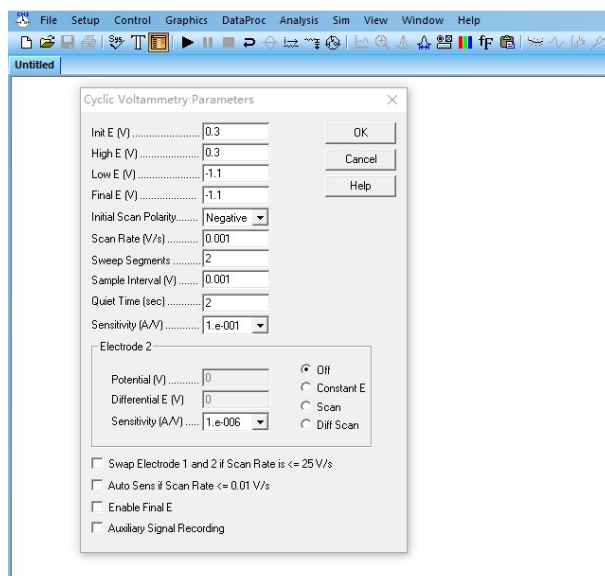

**Fig. S6** Programming the electrochemical workstation for cyclic voltammetry testing of LCO

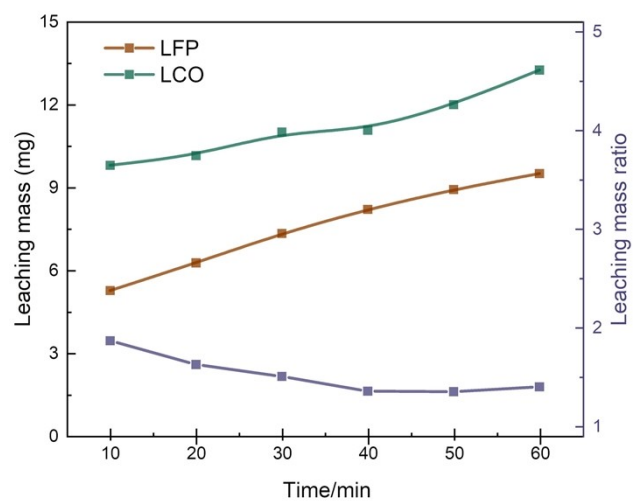

**Fig. S7** Leaching mass and leaching mass ratio of Li of LCO and LFP in two independent chambers.

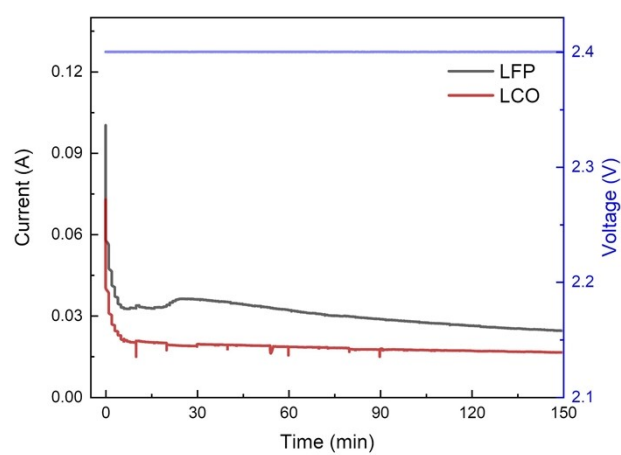

**Fig. S8** Current curves of the LCO electrode and LFP electrode at the same conditions in two independent systems.

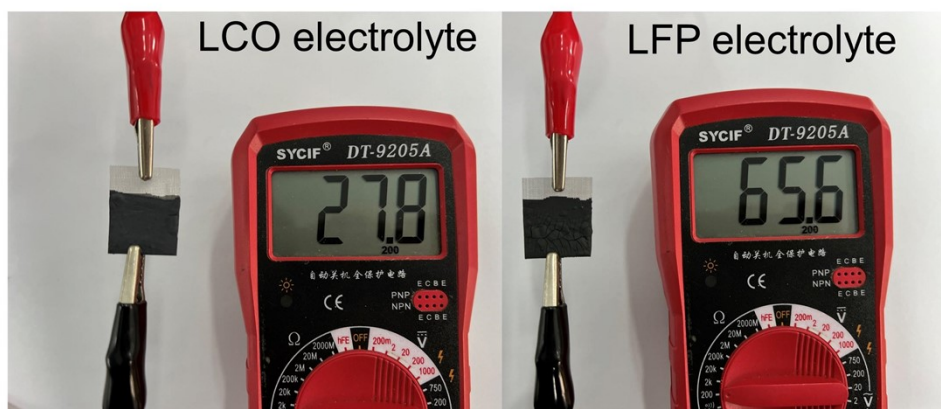

**Fig. S9** Resistance of the homemade LCO electrode and the LFP electrode.

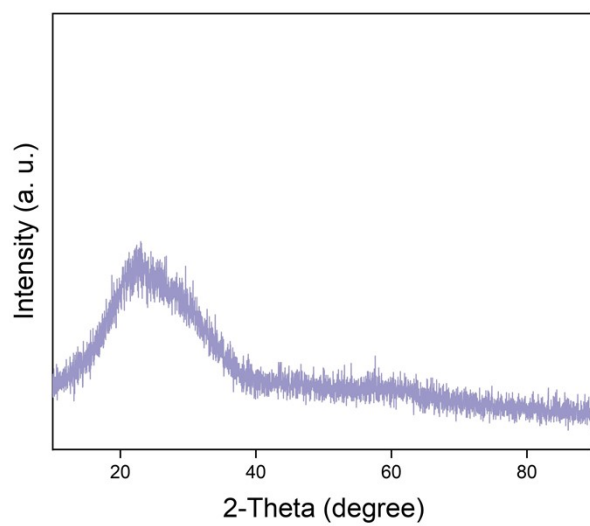

**Fig. S10** XRD pattern of the precipitation in the electrolyte at 80 °C, 0.03 M H<sub>2</sub>SO<sub>4</sub> solution, 240 min.

## **Economic and Environmental Analysis**

The EverBatt model, a closed-loop battery recycling model developed at Argonne National Laboratory, was used to conduct a techno-economic and life-cycle analysis of pyrometallurgical, hydrometallurgical, and the direct electrochemical reduction processes. Our analysis was focused on the total energy use and GHG emissions of the three recycling methods and did not include the emissions or energy associated with their use in electric vehicles.

Pyrometallurgy (Fig. S11) and hydrometallurgy (Fig. S12) are used as end-of-life battery treatment options. Although their entire process may not apply to  $\text{LiFePO}_4$  recovery, especially in the Ni and Co recovery step. In the current industry, pyrometallurgy and hydrometallurgy processes do not sort spent batteries before recycling. Therefore, as assumed in this study, regardless of the cathode composition of the spent battery, it will go through the same recycling process.

In this study, EverBatt's generic direct recovery process is modified to describe the direct electrochemical oxidation process. As shown in Fig. S13, the material undergoes a series of physical separation processes to separate the scrap metal, plastic, and black powder. After that, the collected black powder is worked as the electrolytic anode in  $\text{Na}_2\text{CO}_3$  solution for the process of de-lithiation to recover  $\text{Li}_2\text{CO}_3$  and  $\text{FePO}_4$ .

It is worth noting that the commercial pyrometallurgical flow chart and commercial hydrometallurgical flow chart here are obtained from Everbatt 2020 and are copied here for readers to understand.<sup>1</sup>

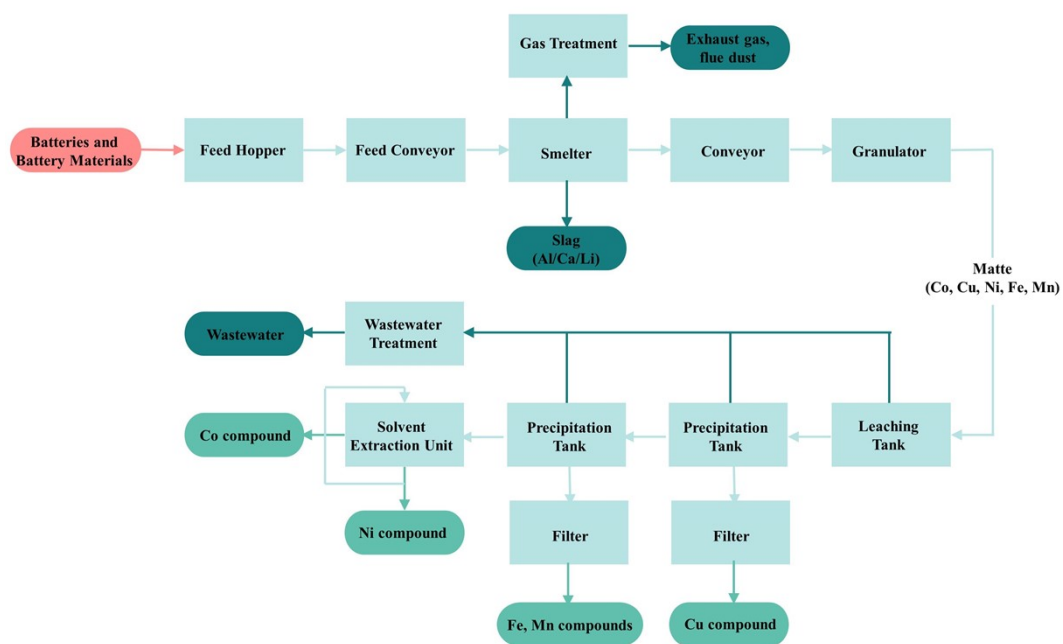

**Fig. S11.** Process diagram of a pyrometallurgical process.

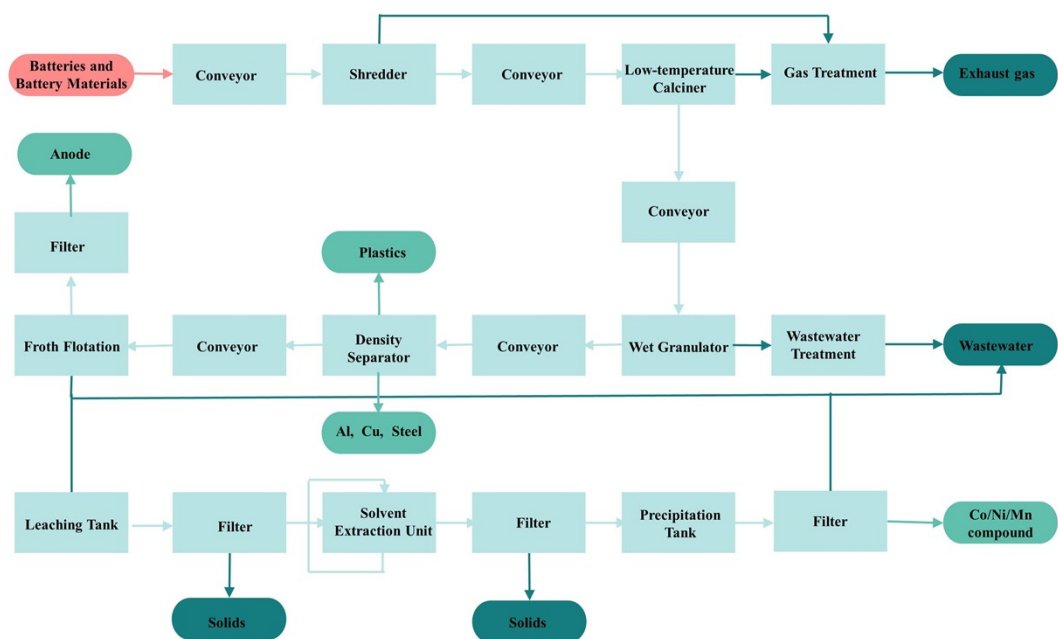

**Fig. S12.** Process diagram of a hydrometallurgical process.

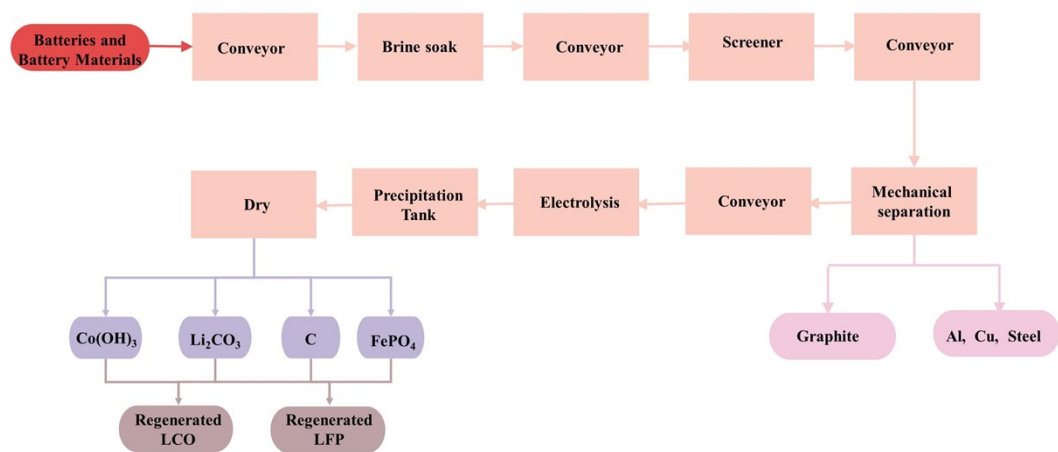

**Fig. S13.** Process diagram of an electrometallurgical process.

**Tab. S1.** Kinetic parameters of Li and Co of LCO at 2.4 V, in 0.03 M H<sub>2</sub>SO<sub>4</sub> solution.

| Temperature<br>(°C) | Surface chemical reaction (Li) |                | Surface chemical reaction (Co) |                |
|---------------------|--------------------------------|----------------|--------------------------------|----------------|
|                     | K (min <sup>-1</sup> )         | R <sup>2</sup> | K (min <sup>-1</sup> )         | R <sup>2</sup> |
| 40                  | 0.00276                        | 0.99236        | 0.00223                        | 0.99632        |
| 50                  | 0.00301                        | 0.99314        | 0.00214                        | 0.99158        |
| 60                  | 0.00566                        | 0.99908        | 0.00498                        | 0.9979         |
| 70                  | 0.00631                        | 0.99796        | 0.00601                        | 0.99553        |
| 80                  | 0.00704                        | 0.99773        | 0.00753                        | 0.99836        |

**Tab. S2.** Kinetic parameters of Li of LFP battery at 2.4 V, in 0.03 M H<sub>2</sub>SO<sub>4</sub> solution.

| Temperature (°C) | Surface chemical reaction |                |
|------------------|---------------------------|----------------|
|                  | K (min <sup>-1</sup> )    | R <sup>2</sup> |
| 40               | 0.00851                   | 0.99903        |
| 50               | 0.00982                   | 0.99875        |
| 60               | 0.01186                   | 0.998959       |
| 70               | 0.014                     | 0.99927        |
| 80               | 0.01608                   | 0.99465        |

**Tab. S3.**  $E_a$  values of Li and Co for LCO and Li for LFP at 2.4 V, in 0.5 M Na<sub>2</sub>CO<sub>3</sub> solution.

| Types          | Li for LCO | Co for LCO | Li for LFP |
|----------------|------------|------------|------------|
| $E_a$ (kJ/mol) | 23.378     | 28.703     | 14.945     |
| $R^2$          | 0.99401    | 0.9939     | 0.99866    |

**Table S4.** Materials requirements (kg) to recycle 1 kg of spent batteries through different recycling technologies.

| Pyrometallurgy    | Hydrometallurgy    | Electrolysis |
|-------------------|--------------------|--------------|
| Hydrochloric acid | Ammonium hydroxide | Soda Ash     |
| Hydrogen peroxide | Hydrochloric acid  |              |
| Limestone         | Hydrogen peroxide  |              |
| Sand              | Sodium hydroxide   |              |
|                   | Sulfuric acid      |              |
|                   | Soda ash           |              |

**Table S5.** Value of recycled materials (\$/kg)

|                              | Pyrometallurgy | Hydrometallurgy | Electrolysis |
|------------------------------|----------------|-----------------|--------------|
| Copper                       | 0.91           | 0.91            | 0.91         |
| Aluminum                     |                | 0.13            | 0.13         |
| Graphite                     |                | 0.08            | 0.04         |
| Co <sup>2+</sup> in products | 12.38          | 12.38           |              |
| LCO                          |                |                 | 18.16        |
| LFP                          |                |                 | 5.5          |

**Reference:**

1. Q. Dai, J. Spangenberg, S. Ahmed, L. Gaines, J. Kelly and M. Wang, *Argonne National Laboratory*, 2019.
